# Supplementary material for: Manipulation of fullerene superstructures by complexing with polycyclic aromatic compounds
Source: Royal Society of Chemistry journal article supplement (doi:10.1039/c7cp04553k), 2017-01-01
Supplement: c7cp04553k1.pdf [file c7cp04553k1.pdf]

## Supporting Information

### Manipulation Fullerene Superstructures by Complexing with Polycyclic Aromatic Compounds

Qin Tang,<sup>a</sup> Shufang Zhang,<sup>b</sup> Xinbang Liu,<sup>a</sup> Masato Sumita,<sup>c</sup> Shinsuke Ishihara,<sup>c</sup> Harald Fuchs,<sup>a,d</sup> Qingmin Ji<sup>\*a</sup>, Lok Kumar Shrestha<sup>\*c</sup> and Katsuhiko Ariga<sup>c,e</sup>

<sup>a</sup> Herbert Gleiter Institute for Nanoscience, Nanjing University of Science and Technology, 200 Xiaolingwei, Nanjing, 210094, China

<sup>b</sup> Department of Material Science and Engineering, Nanjing University of Science & Technology, 200 Xiaolingwei, Nanjing, 210094, China

<sup>c</sup> WPI Center for Materials Nanoarchitectonics, National Institute For Materials Science, 1-1 Namiki, Tsukuba, Ibaraki, 305-0044, Japan

<sup>d</sup> Center for Nanotechnology, University of Münster, Wilhelm Klemm-Str. 10, D-48149 Münster, Germany.

<sup>e</sup> Graduate School of Frontier Sciences, The University of Tokyo, Kashiwa, Chiba, 277-0827, Japan

Corresponding Author: jiqingmin@njust.edu.cn; SHRESTHA.Lokkumar@nims.go.jp

## Additional Experimental Data

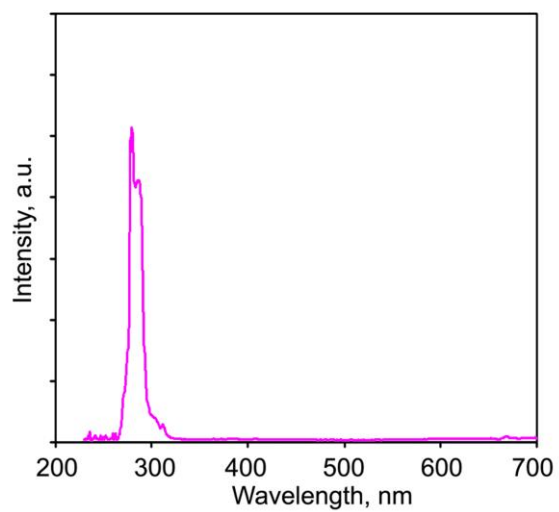

**Figure S1.** UV-vis spectrum of naphthalene in toluene.

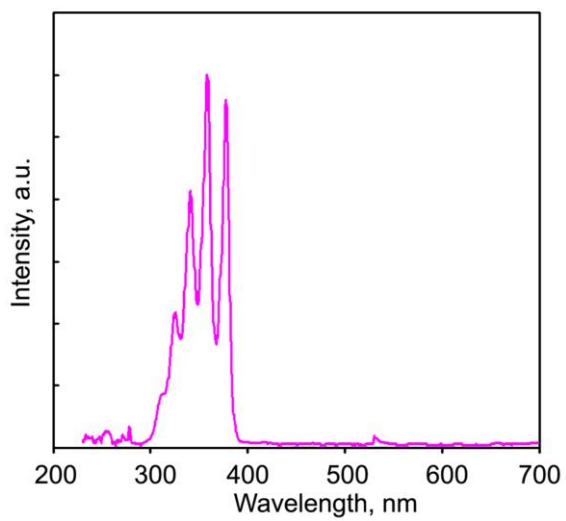

**Figure S2.** UV-vis spectrum of anthracene in toluene.

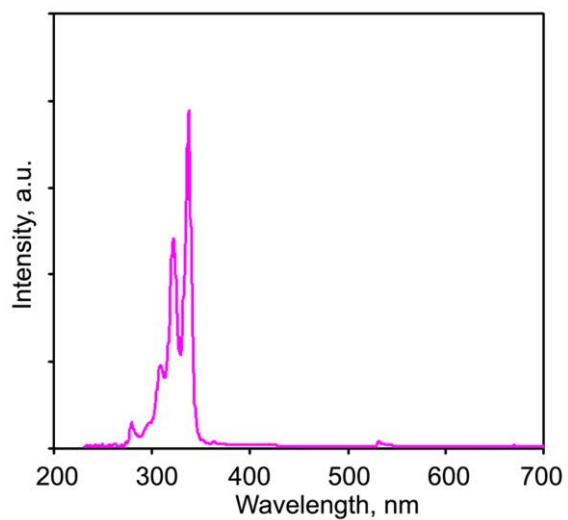

**Figure S3.** UV-vis spectrum of pyrene in toluene.

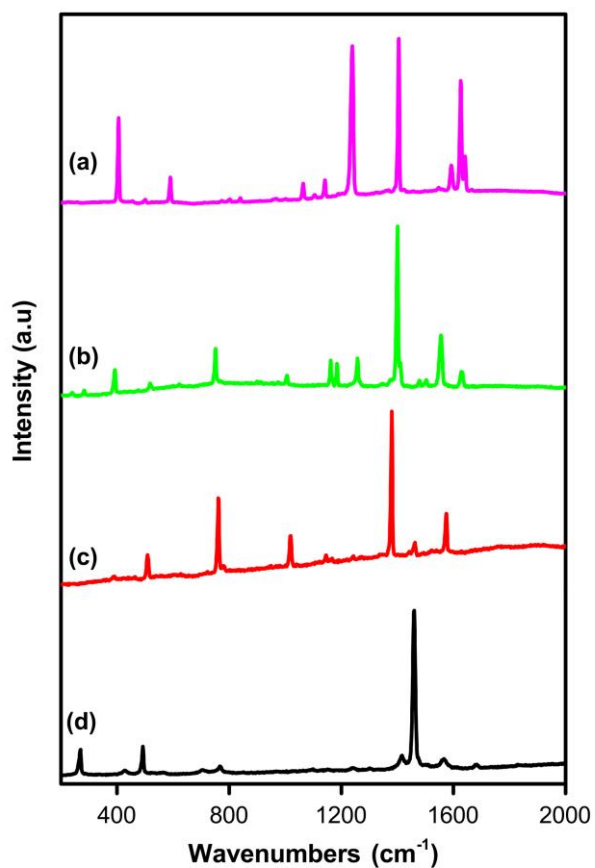

**Figure S4.** Raman spectra of (a) pyrene, (b) anthracene, (c) naphthalene and (d) fullerene  $\text{C}_{60}$ .

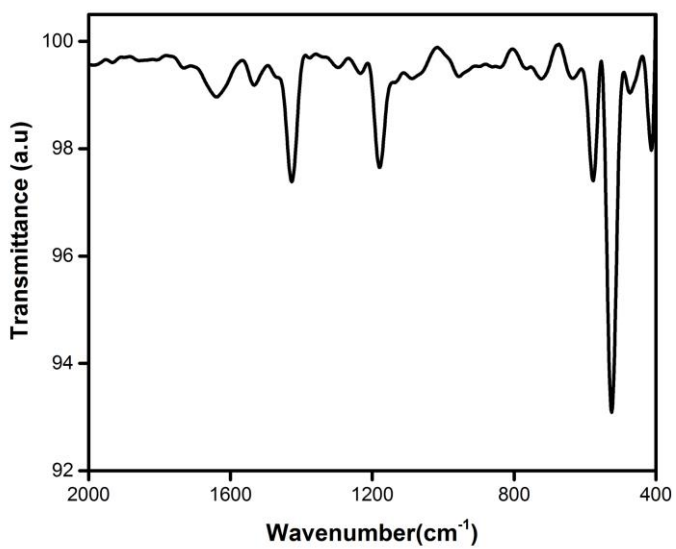

**Figure S5.** FTIR spectrum of C<sub>60</sub>NWs.

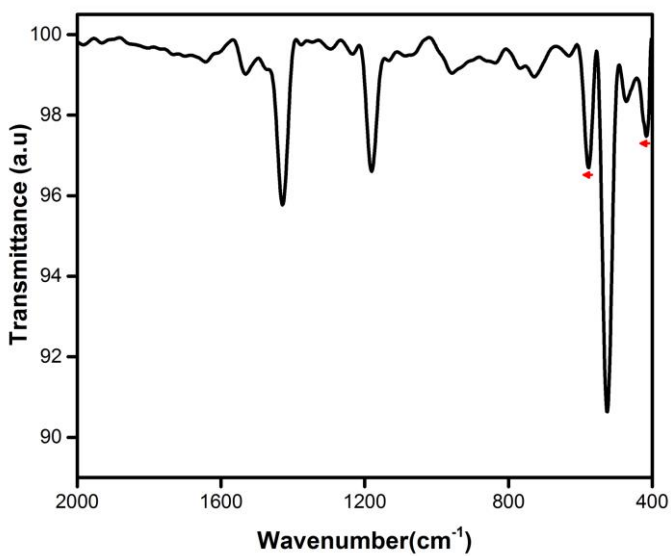

**Figure S6.** FTIR spectrum of naphthalene-C<sub>60</sub>NWs. The red marks indicate the characteristic peaks from naphthalene.

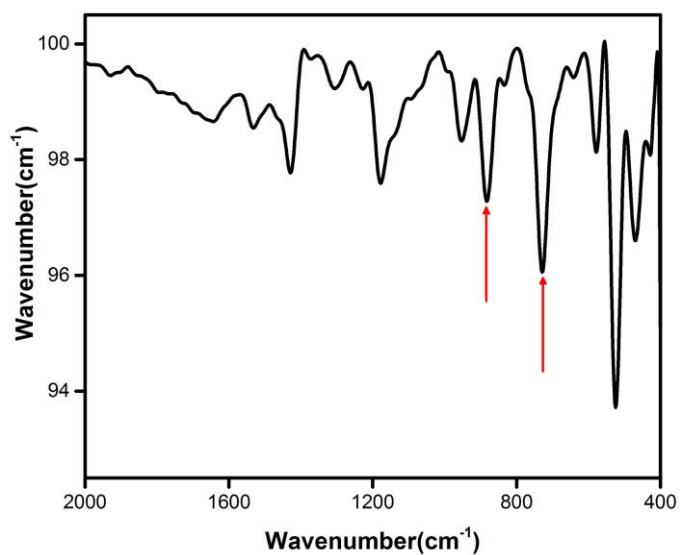

**Figure S7.** FTIR spectrum of anthracene-C<sub>60</sub>NWs. The red marks indicate the characteristic peaks from anthracene.

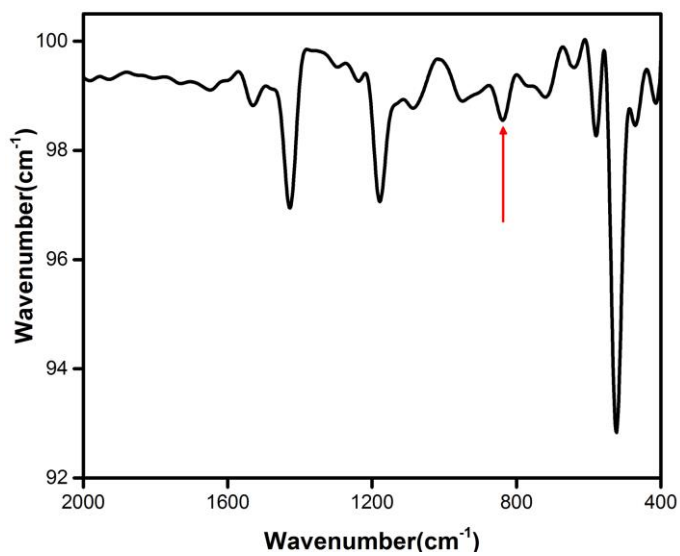

**Figure S8.** FTIR spectrum of pyrene-C<sub>60</sub>NWs. The red marks indicate the characteristic peaks from pyrene.
